# Supplementary material
Source: Copernicus journal article supplement (doi:10.5194/gchron-8-255-2026)
Supplement: Supplementary file [file gchron-8-255-2026-supplement-title-page.pdf › gchron-8-255-2026-supplement-title-page.pdf]

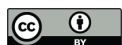

*Supplement of*

**Paired  $^{14}\text{C}$ – $^{10}\text{Be}$  exposure ages from Mount Murphy,  
West Antarctica: Implications for accurate  
and precise deglacial chronologies**

**Jonathan R. Adams et al.**

*Correspondence to:* Jonathan R. Adams ([jonathan-richard.adams@univ-lorraine.fr](mailto:jonathan-richard.adams@univ-lorraine.fr))

- [gchron-8-255-2026-supplement-title-page.pdf](#)
- [Adams-J Supplement.pdf](#)
- [Table S1.xlsx](#)
- [Table S2.xlsx](#)
- [Table S3.xlsx](#)
- [Table S4 .xlsx](#)
- [Table S5.xlsx](#)

The copyright of individual parts of the supplement might differ from the article licence.
